# Supplementary material for: Refractive index modulation in polymers bearing photoreactive phenyl and naphthyl ester units using different UV wavelengths
Source: Royal Society of Chemistry journal article supplement (doi:10.1039/b903410b), 2009-01-01
Supplement: b903410b.pdf [file b903410b.pdf]

## Electronic Supplementary Information

### Refractive Index Modulation in Polymers Bearing Photoreactive Phenyl and Naphthyl Ester Units Using Different UV Wavelengths

Thomas Griesser, Thomas Höfler, Georg Jakopic, Manuela Belzik, Wolfgang Kern and  
Gregor Trimmel

#### NMR-spectra of monomers and polymers:

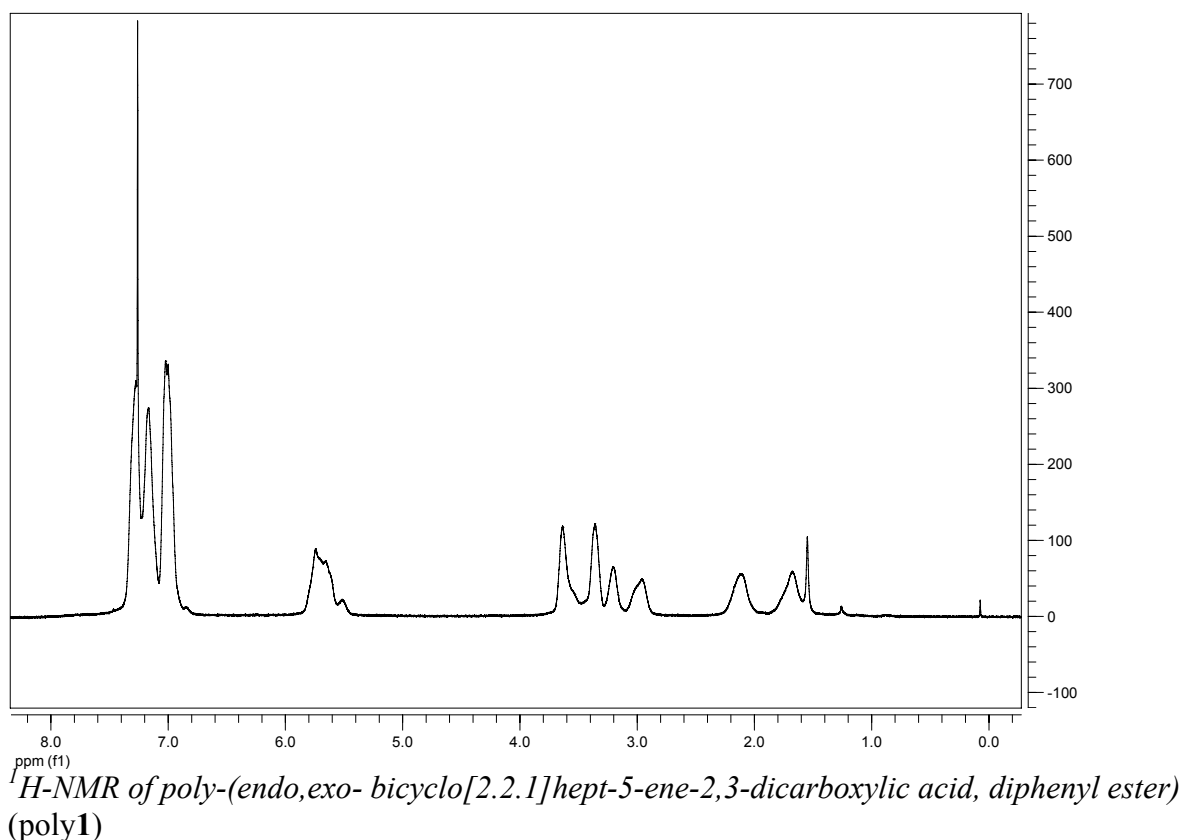

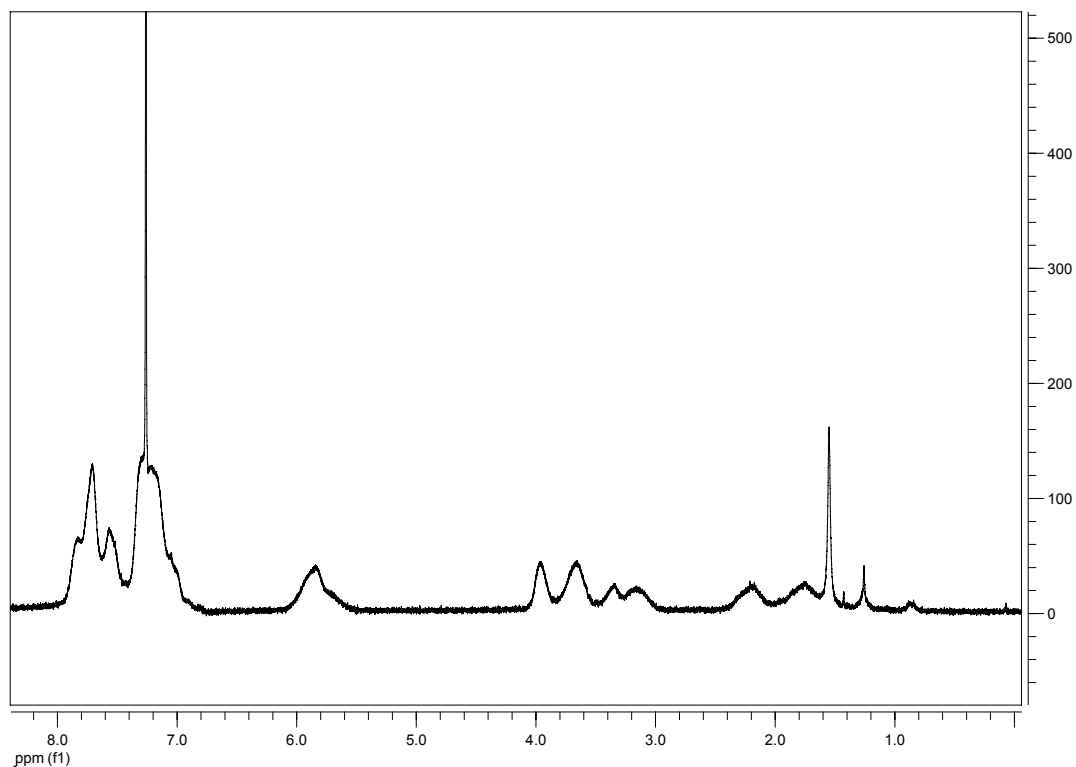

$^1\text{H-NMR}$  of poly (*endo,exo*- bicyclo[2.2.1]hept-5-ene-2,3-dicarboxylic acid, di-(1-naphthyl-ester)) (poly **2**)

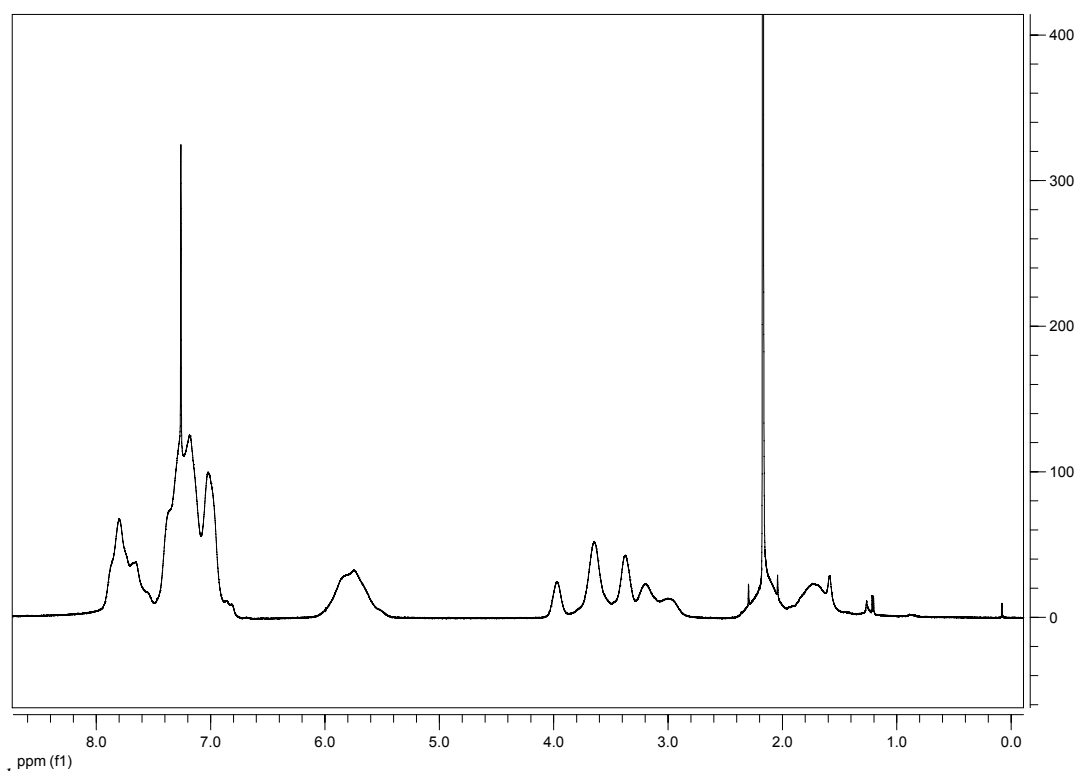

$^1\text{H-NMR}$  of poly-[(*endo,exo*- bicyclo[2.2.1]hept-5-ene-2,3-dicarboxylic acid, diphenyl ester)-co-(*endo,exo*- bicyclo[2.2.1]hept-5-ene-2,3-dicarboxylic acid, di-(1-naphthyl-ester))] (poly(**1-co-2**))

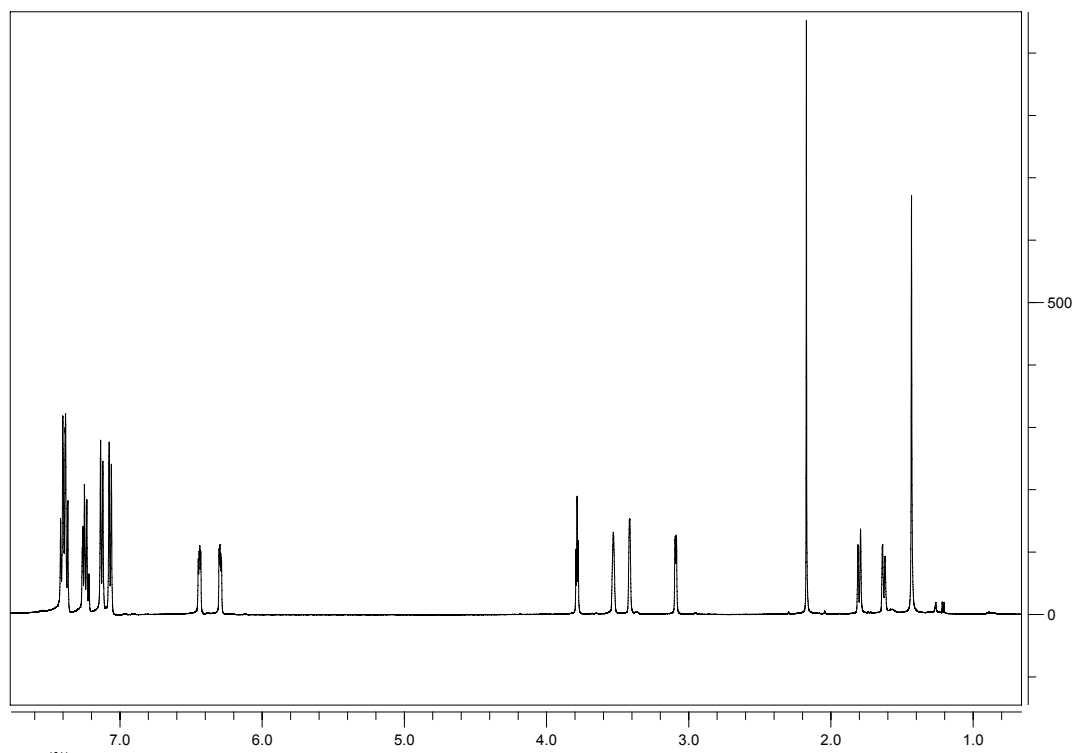

<sup>1</sup>H-NMR of *endo,exo*-Bicyclo [2.2.1]hept-5-ene-2,3-dicarboxylic acid, diphenyl ester

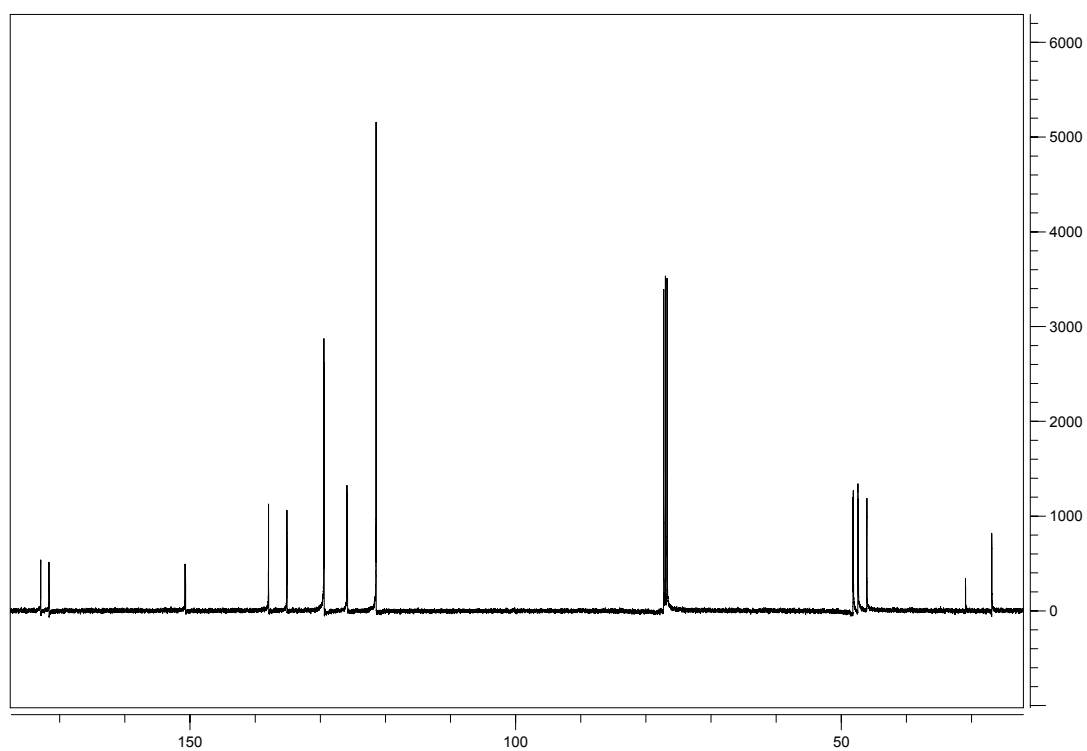

<sup>13</sup>C-NMR of *endo,exo*-Bicyclo [2.2.1]hept-5-ene-2,3-dicarboxylic acid, diphenyl ester

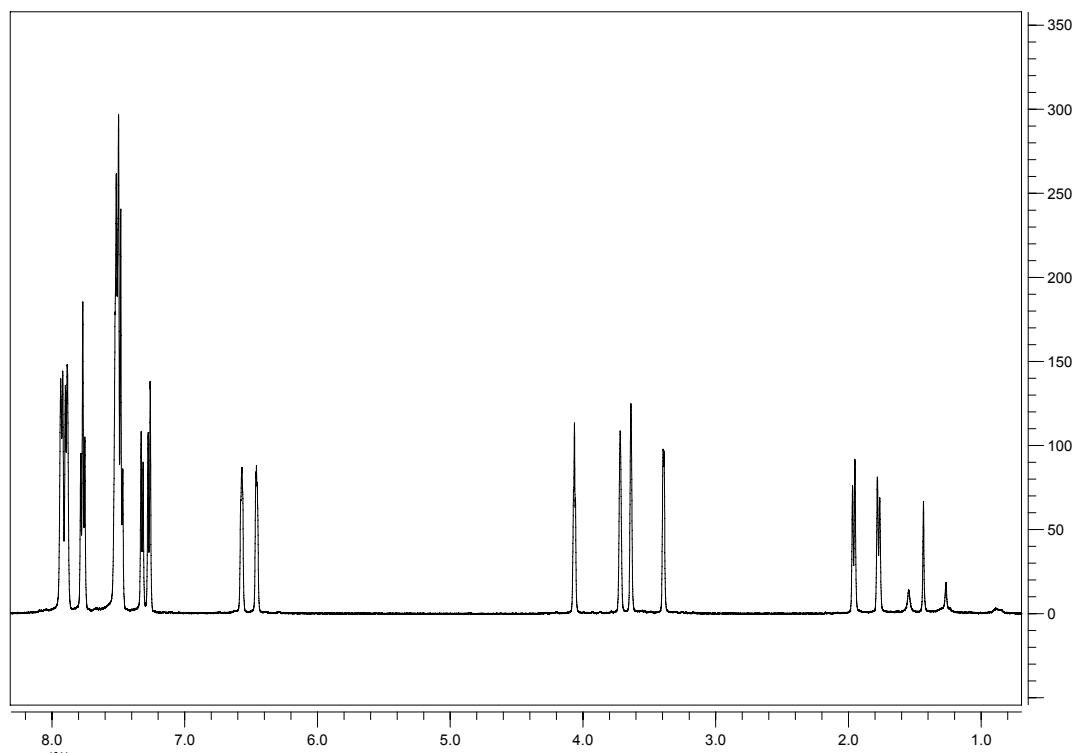

<sup>1</sup>H-NMR of *endo,exo*-Bicyclo[2.2.1]hept-5-ene-2,3-dicarboxylic acid, di-(1-naphthyl-ester)

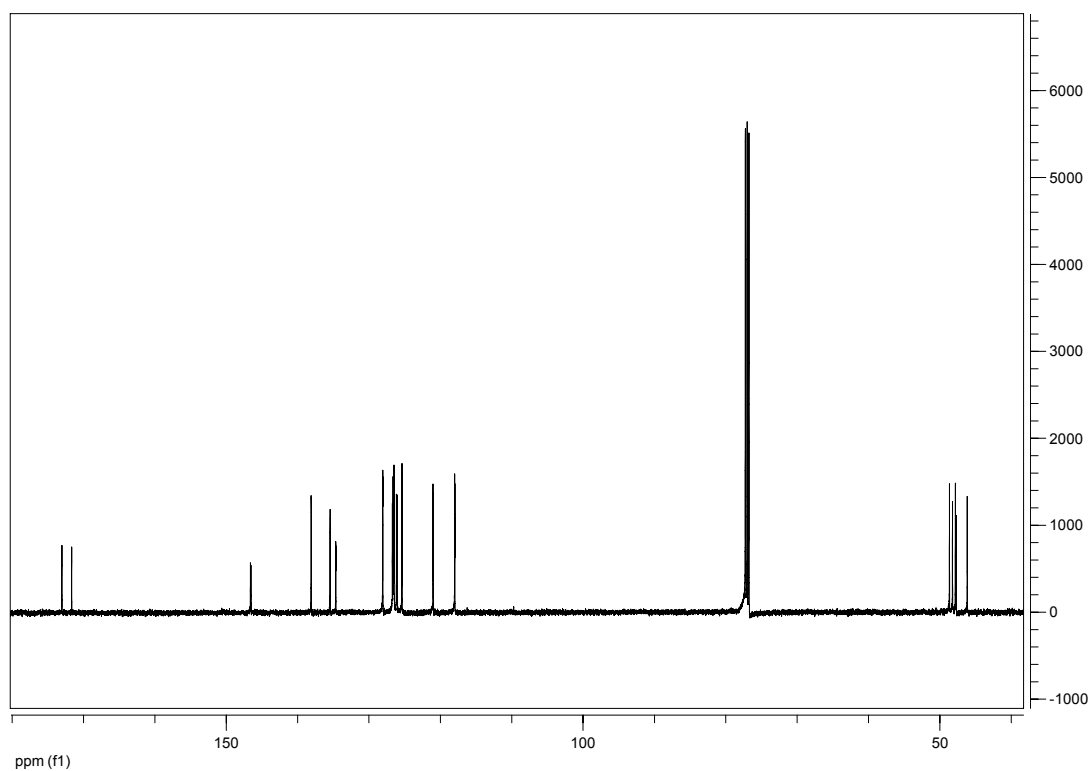

<sup>13</sup>C-NMR of *endo,exo*-Bicyclo[2.2.1]hept-5-ene-2,3-dicarboxylic acid, di-(1-naphthyl-ester)
